# Supplementary material
Source: HighWire-hosted journal article supplement (https://ard.bmj.com/content/ard-2022-222731)

**Supplementary Figure 2.** The proportion (%) of patients who remained flare-free based on an ASDAS worsening of  $\geq 0.9$  through 104 weeks. \* $p < 0.05$ , † $p < 0.01$ , ‡ $p < 0.001$  versus IXE Withdrawal (placebo).

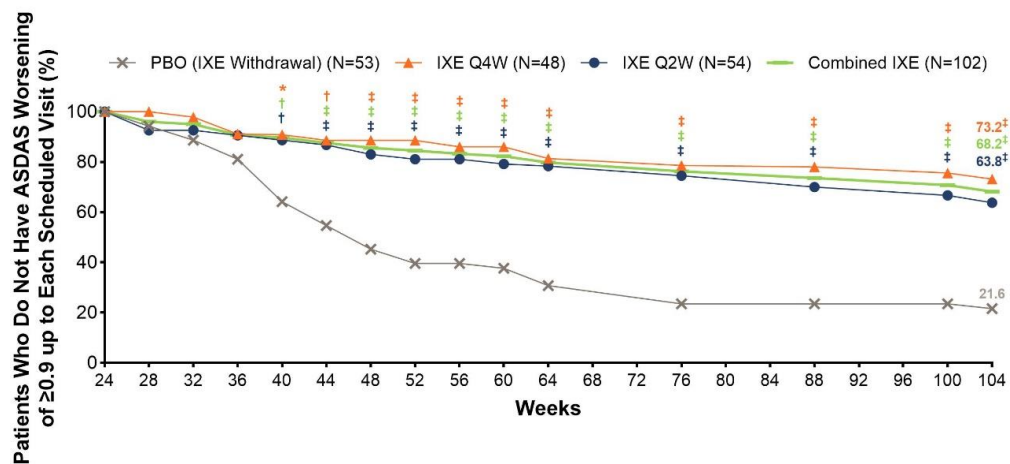

Supplement: inline-supplementary-material-3 [file inline-supplementary-material-3.pdf]
